# Supplementary material
Source: PubMed Central journal article supplement (PMC2206122)
Supplement: 7601940s1.pdf [file 7601940s1.pdf]

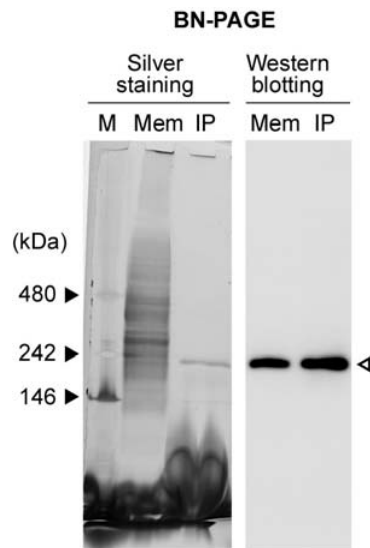

**Supplementary Figure 1** BN-PAGE analysis of *Pyrococcus furiosus* oligosaccharyltransferase before and after immunoaffinity purification. Oligosaccharyltransferase was purified from *P. furiosus* cells by immunoaffinity, using an anti-*P. furiosus* sSTT3 antibody. The membrane fraction (Mem) and the immunoaffinity purified sample (IP) were subjected to BN-PAGE, and the proteins on the gels were visualized by silver staining and western blotting, using an anti-*P. furiosus* sSTT3 antibody as the primary antibody.

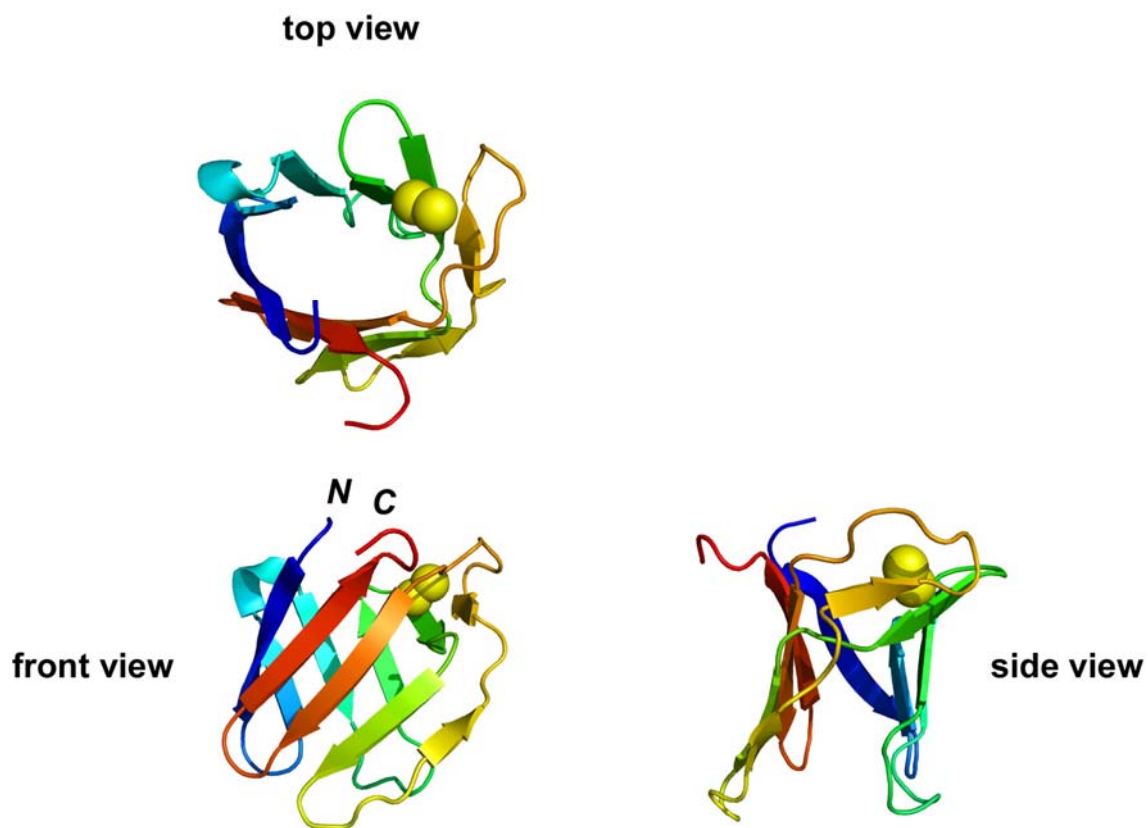

**Supplementary Figure 2** Architecture of the IS domain. The IS (insertion) domain (residues 601-682) is shown in a ribbon representation. The sulfur atoms that form a disulfide bond are depicted as yellow spheres.



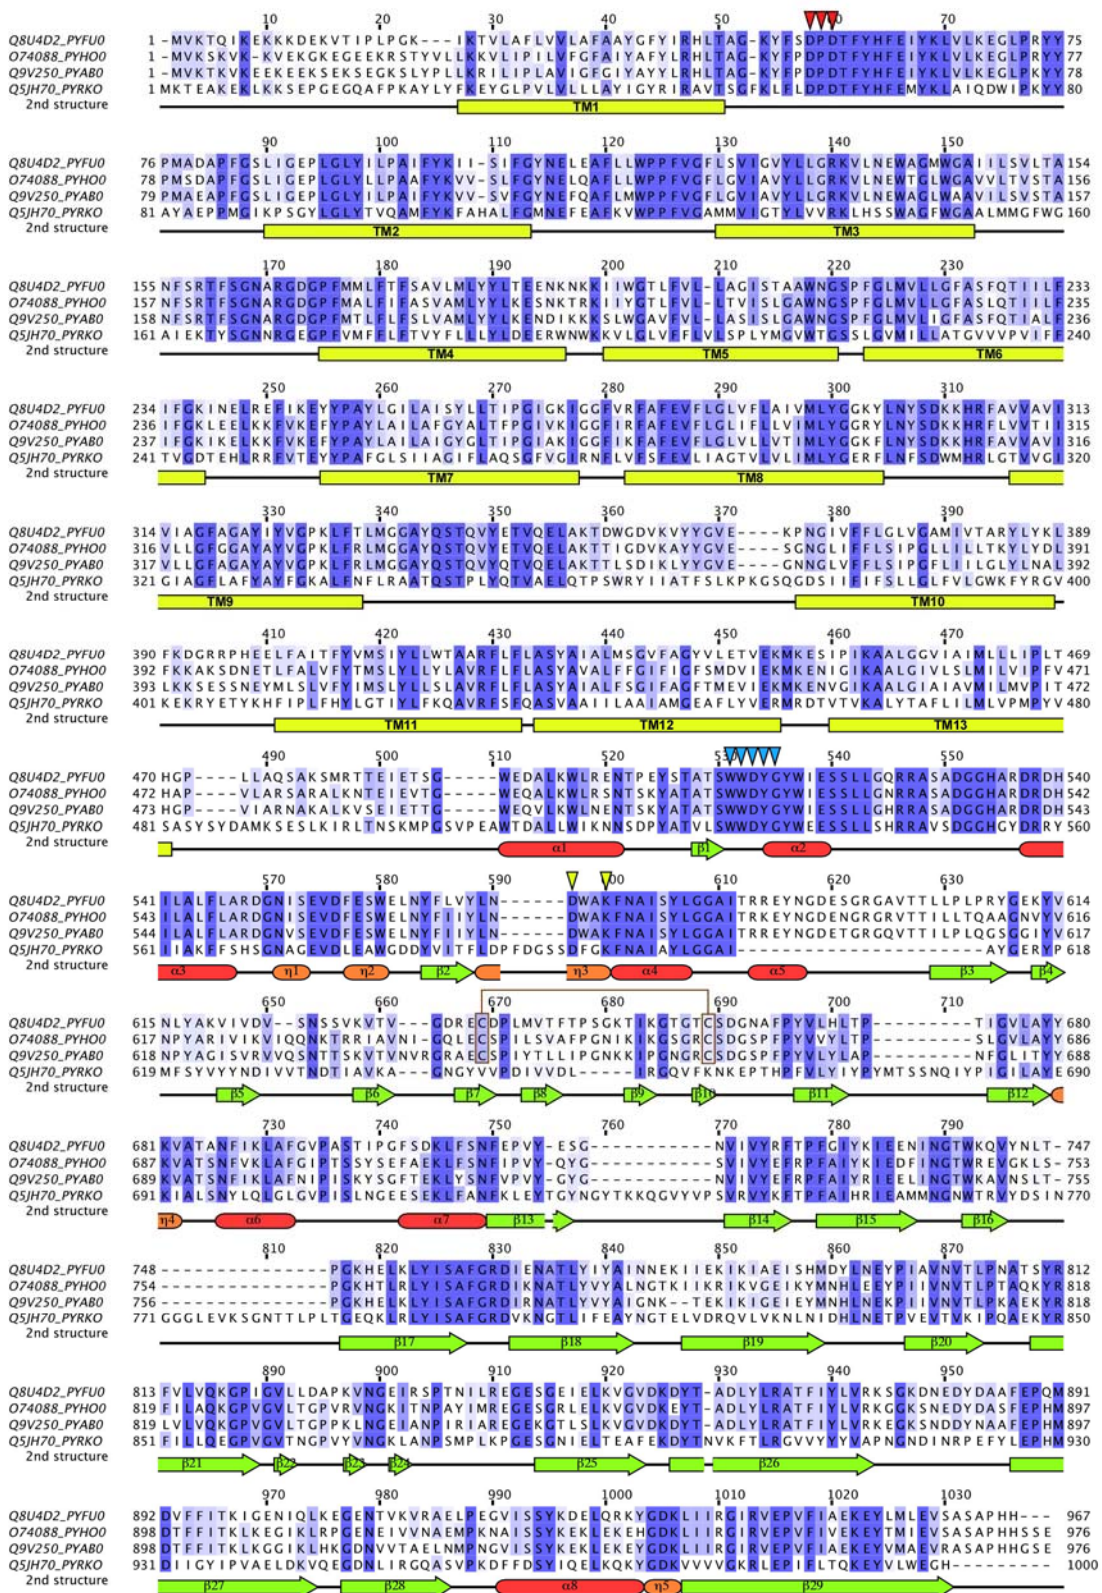

**Supplementary Figure 3** Sequence alignment and secondary structure elements of STT3s from four *Thermococcales* genomes. The multiple sequence alignment of *Thermococcales* STT3 proteins was retrieved from the HOGENOM database (release 03, October, 2005, <http://pbil.univ-lyon1.fr/databases/hogenom.html>). The gene family alignment HBG230711 contains three sequences belonging to *Pyrococcus*: *P. furiosus* (Q8U4D2\_PYFU0), *P. horikoshii* (O74088\_PYHO0), and *P. abyssi* (Q9V250\_PYAB0), and one sequence belonging to *Thermococcus*: *T. kodakaraensis* (Q5JH70\_PYRKO). *T. kodakaraensis* was reported as *Pyrococcus* sp., but has been re-classified as *Thermococcus* sp. (Atomi *et al*, 2004). The positions of the transmembrane helices were estimated using the program SOSUI (<http://bp.nuap.nagoya-u.ac.jp/sosui/>) as TM1 - TM13 below the N-terminal half of the alignment, and the experimentally determined secondary structure elements are shown below the C-terminal half of the alignment.  $\beta$ ,  $\alpha$ ,  $\eta$  represent a  $\beta$ -strand, an  $\alpha$ -helix, and a  $3_{10}$  helix, respectively. The secondary structure assignment was carried out by the program DSSP implemented in ESPript 2.2 (<http://esprict.ibcp.fr/ESPript/ESPript/index.php>). The triangles indicate the amino acid residues belonging to the DXD motif (red), the WWDYD motif (cyan), and the DK motif (yellow). The figure of the alignment was generated with the program Jalview (<http://www.jalview.org/>).

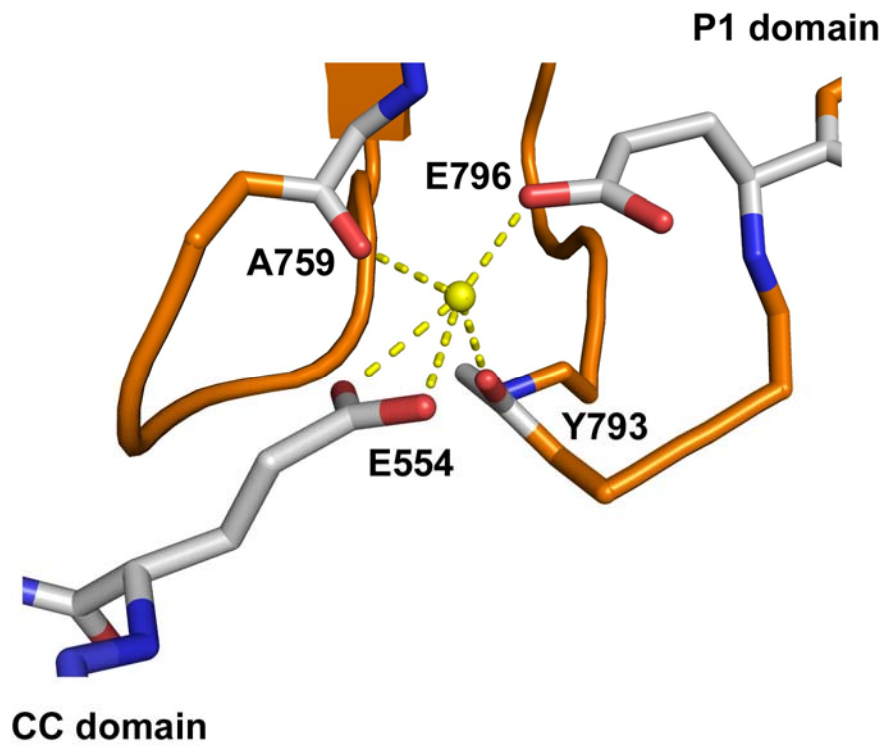

**Supplementary Figure 4** Metal binding site. Close-up view of the metal binding site, with the side chains of E554 and E796, and the main chains of A759 and Y793. The metal ion is estimated to be a  $\text{Ca}^{2+}$  ion. The distances shorter than 3 Å are shown as yellow dotted lines.

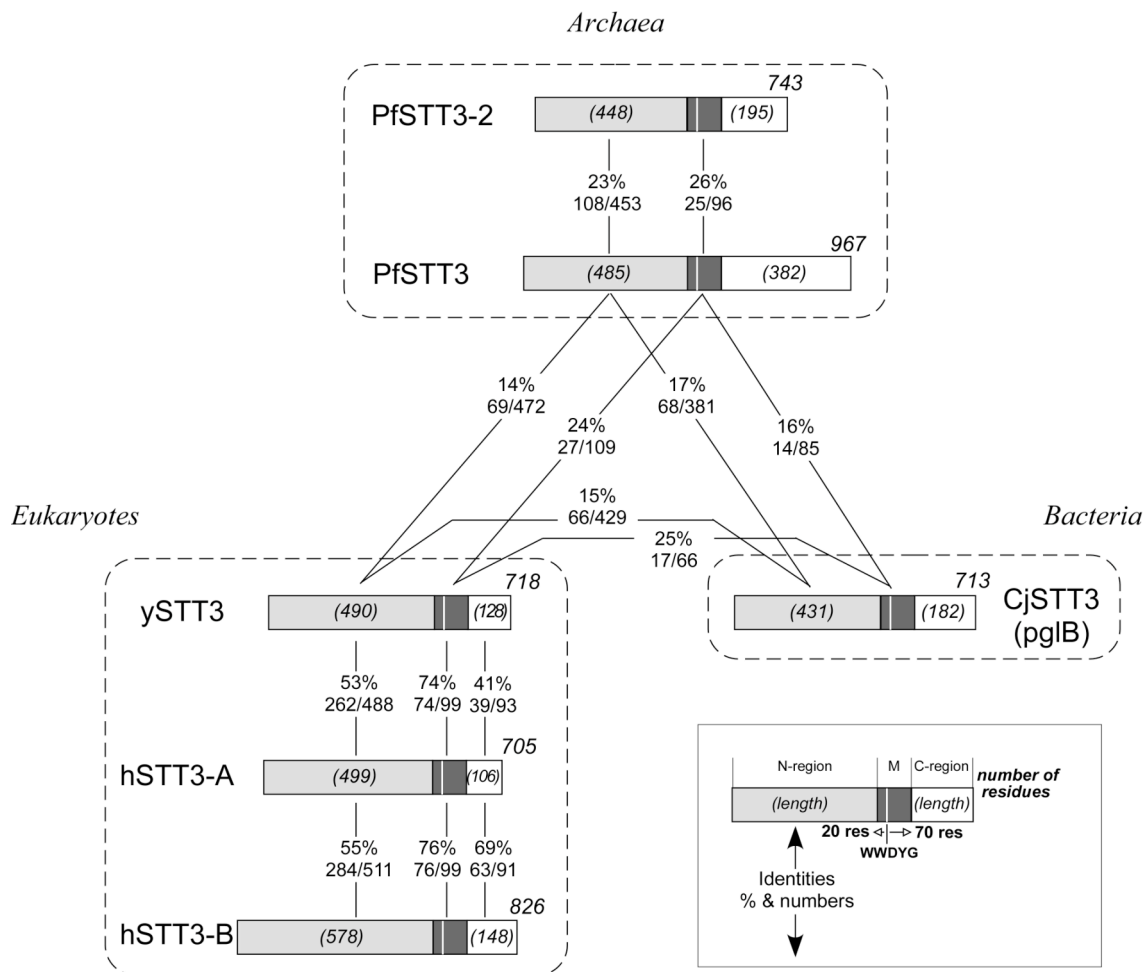

**Supplementary Figure 5** Sequence identities between STT3 proteins. The entire sequence of the STT3 proteins is divided into three regions. The M-region (95 residues) was defined as extending 20 residues toward the N-terminus from the WWDYG motif and 70 residues toward the C-terminus. The N-region and C-region were defined as the N-terminal and C-terminal segments that flank the M-region. Percentage sequence identities were calculated using Blast2p (<http://www.ncbi.nlm.nih.gov/blast/bl2seq/wblast2.cgi>). If Blast2p failed to calculate a sequence identity that covered the majority of the region, then PSI-BLAST was used (<http://www.ncbi.nlm.nih.gov/BLAST>). The numerators are the number of identical residues, and the denominators are the number of aligned positions including gaps. h, human; y, yeast; Pf, *Pyrococcus furiosus*; Cj, *Campylobacter jejuni*. The human and *P. furiosus* genomes each contain two paralogs of STT3.

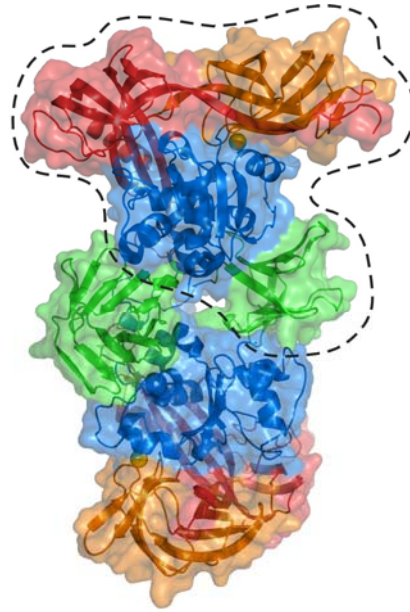

**Supplementary Figure 6** Dimer interaction in crystal structure. Two sSTT3 molecules in the crystal form a dimer, with a contact surface area of  $1,300 \text{ \AA}^2$  per molecule. Since the asymmetric unit contains four sSTT3 molecules, two pairs of the sSTT3 dimers exist in the asymmetric unit. A gel filtration experiment suggested that sSTT3 is monomeric in solution (Igura *et al*, 2007).



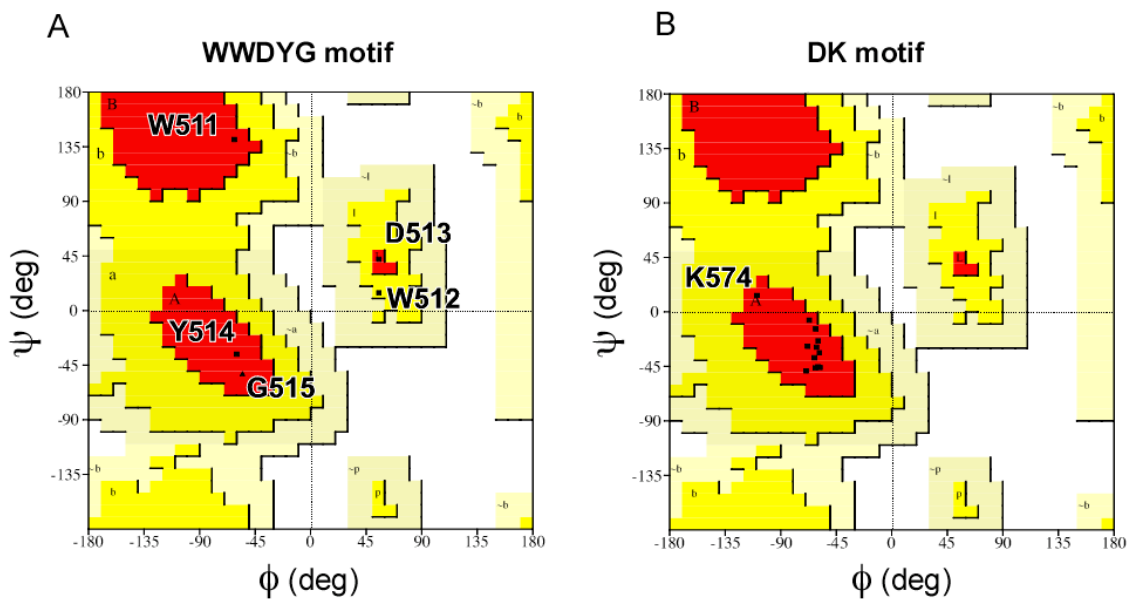

**Supplementary Figure 7** Ramachandran plot. **(A)** The N-terminal half segment of the WWDYG motif,  $W^{511}WD^{513}$ , adopts a 'left-handed'  $3_{10}$  conformation. The program DSSP was used for secondary structure element assignment. The assignment to a left-handed  $3_{10}$  conformation is attributed to the unusual location of W512 and D513 in the Ramachandran plot. **(B)** The segment containing the DK motif,  $L^{569}NDWAK^{574}$ , forms a 6-residue  $3_{10}$  helix and the subsequent segment,  $F^{575}NAISYL^{581}$ , adopts an  $\alpha$ -helical conformation. The Ramachandran plots were generated by the program PROCHECK (Laskowski *et al*, 1993) in the CCP4 suite.

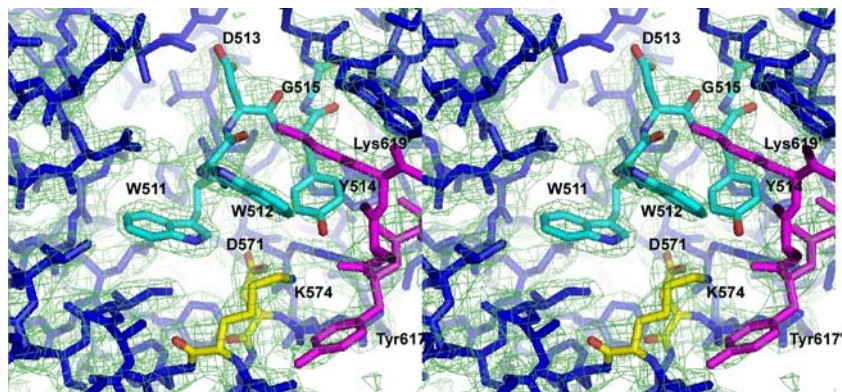

**Supplementary Figure 8** Close-up Stereoview of the Putative Active Site of OST/STT3. The electron density from the sigmaA weighted  $2F_o - F_c$  map calculated from the final coordinates, contoured at  $1.5\sigma$  (green), is superimposed on the final refined structure. The WWDYG and DK motifs are drawn in cyan and yellow, respectively. The residues belonging to the IS domain of the other molecule of the STT3 dimer in the crystal (Supplementary Figure 6) are drawn in magenta, and their numbering is marked by an apostrophe.

**Supplementary Table 1 Growth phenotype of yeast STT3 point mutations**

| Mutant <sup>a</sup> | Growth phenotype <sup>b</sup> | reference <sup>c</sup> |
|---------------------|-------------------------------|------------------------|
| WT                  | normal                        | -                      |
| WWDYG motif         |                               |                        |
| W516A               | t.s.                          | 1                      |
| W516Y               | t.s.                          | 1                      |
| W517Y               | lethal                        | 1                      |
| D518E               | lethal                        | 1, this study          |
| Y519A               | t.s.                          | 1, this study          |
| G520A               | t.s.                          | 1                      |
| G520S               | t.s.                          | 2                      |
| G520D               | t.s.                          | 1                      |
| DK motif            |                               |                        |
| D582A               | t.s.                          | this study             |
| D583A               | lethal                        | this study             |
| D583E               | normal                        | this study             |
| I584A               | normal                        | this study             |
| N585A               | normal                        | this study             |
| K586A               | lethal                        | this study             |
| K586R               | lethal                        | this study             |
| F587A               | normal                        | this study             |
| L588A               | normal                        | this study             |
| W589A               | t.s.                          | this study             |
| M590A               | normal                        | this study             |
| I591A               | normal                        | this study             |
| R592A               | normal                        | 1                      |
| I593A               | t.s.                          | 1                      |
| I593D               | t.s.                          | 1                      |

<sup>a</sup> The position of replaced amino acid residues in yeast STT3 protein.

<sup>b</sup> Growth phenotype was determined by the plasmid shuffling procedure using 5-FOA selection. t.s., temperature-sensitive.

<sup>c</sup> Reference 1, Yan and Lennarz (2002); reference 2, Spirig et al. (1997).
